# Supplementary material for: Over or under: hydride attack at the metal versus the coordinated nitrosyl ligand in ferric nitrosyl porphyrins
Source: Royal Society of Chemistry journal article supplement (doi:10.1039/c6dt03860c), 2016-01-01
Supplement: c6dt03860c1.pdf [file c6dt03860c1.pdf]

## Supporting Information

### **Over or under: Hydride attack at the metal versus the coordinated nitrosyl ligand in ferric nitrosyl porphyrins**

E. G. Abucayon,<sup>a</sup> R. L. Khade,<sup>b</sup> D. R. Powell,<sup>a</sup> M. J. Shaw,<sup>c</sup> Y. Zhang,<sup>\*b</sup> and G. B. Richter-Addo<sup>\*a</sup>

#### **Contents:**

1. Figure S1. <sup>1</sup>H NMR spectra of the product mixture from the reaction of [(PPDME)Fe(NO)(L)]OTf with [NBu<sub>4</sub>]BH<sub>4</sub> and the analogous labeled reaction employing <sup>15</sup>N-labeled precursor [(PPDME)Fe(<sup>15</sup>NO)(5-MeIm)]OTf (page S2)
2. Figure S2. <sup>1</sup>H NMR spectroscopic detection of the H<sub>2</sub> (in CDCl<sub>3</sub>) byproduct from the decomposition of (PPDME)Fe(HNO)(1-MeIm) (page S3)
3. Table S1. NO Vibrational Frequencies and <sup>1</sup>H NMR Chemical Shifts (page S3)
4. Table S2. Relative Energies with Respect to Reactants (kcal/mol) (page S4)
5. Table S3. Selected DFT-Calculated Geometric Parameters (page S4)
6. Table S4. Charges of Selected Atoms and Groups (page S4)
7. Table S5. Bond Strength Energies (kcal/mol) (page S4)
8. Figure S3. Molecular structure of the cation of [(PPDME)Fe(NO)(5-MeIm)]SbF<sub>6</sub> (page S5)
9. Experimental details for X-ray structure of [(PPDME)Fe(NO)(5-MeIm)]SbF<sub>6</sub> (page S5)
10. Table S6. Crystal data and structure refinement for [(PPDME)Fe(NO)(5-MeIm)]SbF<sub>6</sub> (page S7)
11. Table S7. Bond lengths (Å) and angles (°) for [(PPDME)Fe(NO)(5-MeIm)]SbF<sub>6</sub> (page S8)
12. Figure S4. Molecular structure of [(OEP)Fe(NO)]OTf (page S13)
13. Experimental details for X-ray structure of [(OEP)Fe(NO)]OTf (page S13)
14. Table S8. Crystal data and structure refinement for [(OEP)Fe(NO)]OTf.2(CH<sub>2</sub>Cl<sub>2</sub>) (page S15)
15. Table S9. Bond lengths (Å) and angles [°] for [(OEP)Fe(NO)]OTf.2(CH<sub>2</sub>Cl<sub>2</sub>) (page S16)

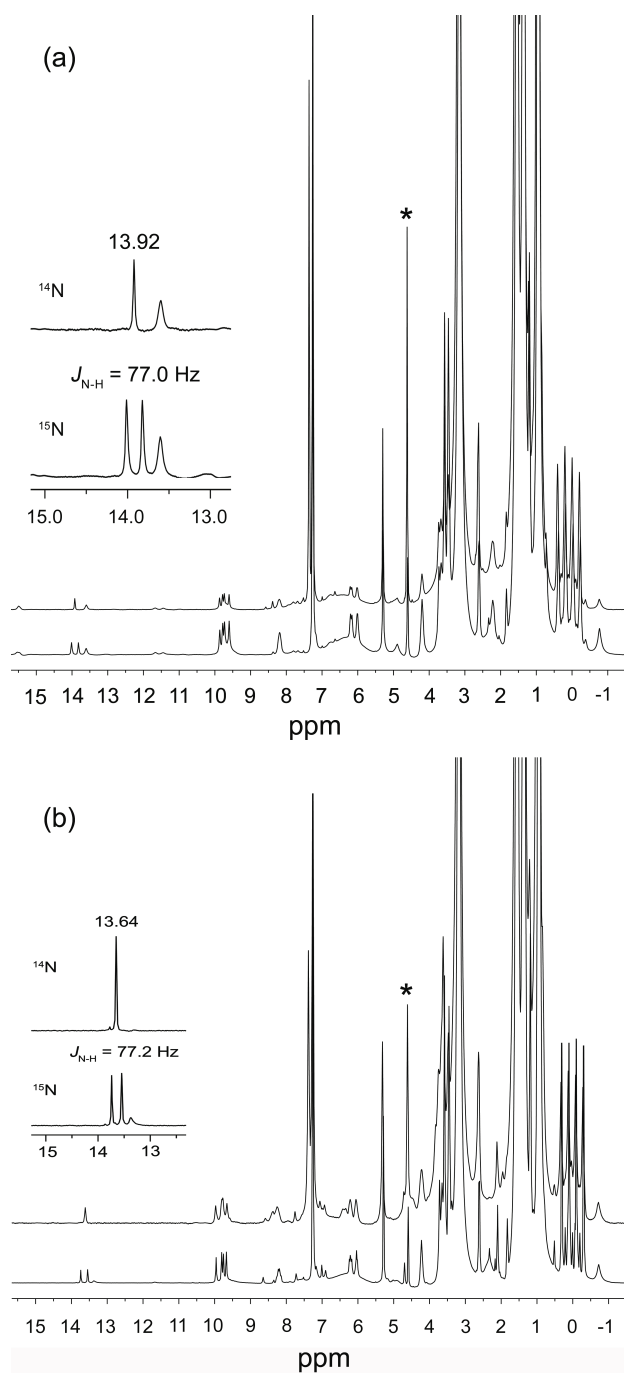

**Figure S1.** (a)  $^1\text{H}$  NMR spectra of, (*top*) the product mixture from the reaction of  $[(\text{PPDME})\text{Fe}(\text{NO})(5\text{-MeIm})]\text{OTf}$  with  $[\text{NBu}_4]\text{BH}_4$ , (*bottom*) the product mixture from the analogous reaction employing the  $^{15}\text{N}$ -labeled precursor  $[(\text{PPDME})\text{Fe}(^{15}\text{NO})(5\text{-MeIm})]\text{OTf}$ . (b)  $^1\text{H}$  NMR spectra of, (*top*) the product mixture from the reaction of  $[(\text{PPDME})\text{Fe}(\text{NO})(1\text{-MeIm})]\text{OTf}$  with  $[\text{NBu}_4]\text{BH}_4$ , (*bottom*) the product mixture from the analogous reaction employing the  $^{15}\text{N}$ -labeled precursor  $[(\text{PPDME})\text{Fe}(^{15}\text{NO})(1\text{-MeIm})]\text{OTf}$ . The peak at 4.62 ppm (labeled \*) observed in both reactions is assigned to  $\text{H}_2$  gas (see also Figure S3). The downfield (*Inset*) regions of the spectra focus on the  $^{15}\text{N}$ -isotope-sensitive Fe-HNO signals; these HNO signals were integrated against a  $\text{C}_6\text{H}_6$  internal standard. The product mixtures also contain the final paramagnetic  $(\text{PPDME})\text{Fe}(\text{NO})$  products.

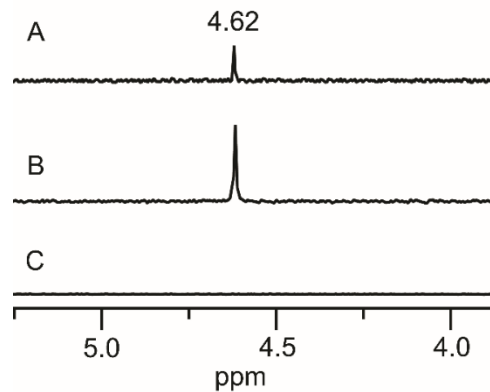

**Figure S2.**  $^1\text{H}$  NMR spectroscopic detection of the  $\text{H}_2$  (in  $\text{CDCl}_3$ ) byproduct from the decomposition of  $(\text{PPDME})\text{Fe}(\text{HNO})(1\text{-MeIm})$ . (A) Spectrum of the reaction headspace. (B) Spectrum of an authentic  $\text{H}_2/\text{N}_2$  mixture. (C) Spectrum of the blank  $\text{CDCl}_3$  solvent.

Table S1. NO Vibrational Frequencies and  $^1\text{H}$  NMR Chemical Shifts

| System <sup>a</sup>                                |      |                                                                                      | $\delta_{\text{H}}$<br>(ppm) | $\nu_{\text{NO}}$<br>( $\text{cm}^{-1}$ ) |
|----------------------------------------------------|------|--------------------------------------------------------------------------------------|------------------------------|-------------------------------------------|
| $\text{Fe}(\text{TTP})(5\text{-MeIm})(\text{HNO})$ | Expt |                                                                                      | 14.26                        | 1381                                      |
|                                                    | Calc | 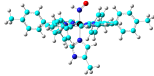 | 14.60                        | 1371                                      |
| $\text{Fe}(\text{TTP})(1\text{-MeIm})(\text{HNO})$ | Expt |                                                                                      | 14.02                        | 1389                                      |
|                                                    | Calc |  | 14.55                        | 1369                                      |
| $\text{Fe}(\text{OEP})(5\text{-MeIm})(\text{HNO})$ | Expt |                                                                                      | 13.99                        | 1383                                      |
|                                                    | Calc |  | 13.91                        | 1369                                      |
| $\text{Fe}(\text{OEP})(1\text{-MeIm})(\text{HNO})$ | Expt |                                                                                      | 13.72                        | 1388                                      |
|                                                    | Calc |  | 13.92                        | 1371                                      |

a) The orientation of the NO moiety of HNO is *cis* to imidazole Me substituent, which was found to be slightly more favorable than the *trans* isomer, as reported previously.<sup>2</sup>

Table S2. Relative Energies with Respect to Reactants (in kcal/mol)

| Pathway   | System                                 | $\Delta E_{\text{SCF}}$ | $\Delta E_{\text{SCF+ZPE}}$ | $\Delta H$ | $\Delta G$ |
|-----------|----------------------------------------|-------------------------|-----------------------------|------------|------------|
|           | <b>R1+R2</b>                           | 0.00                    | 0.00                        | 0.00       | 0.00       |
| N-Pathway | <b>I-1<sub>N</sub></b>                 | -12.22                  | -10.71                      | -10.62     | -1.33      |
|           | <b>TS<sub>N</sub></b>                  | -12.08                  | -11.04                      | -11.39     | -1.08      |
|           | <b>I-2<sub>N</sub></b>                 | -49.69                  | -45.51                      | -46.25     | -33.91     |
|           | <b>P-1<sub>N</sub> + P2</b>            | -87.46                  | -79.42                      | -81.17     | -69.04     |
| H-Pathway | <b>R1+R2</b>                           | 0.00                    | 0.00                        | 0.00       | 0.00       |
|           | <b>I-1<sub>H</sub>/I-2<sub>H</sub></b> | -30.30                  | -28.58                      | -28.79     | -18.90     |
|           | <b>TS<sub>H</sub></b>                  | -30.13                  | -28.78                      | -29.41     | -18.51     |
|           | <b>P-1<sub>H</sub>+ P2</b>             | -59.92                  | -54.39                      | -55.98     | -44.72     |

Table S3. Selected DFT-Calculated Geometric Parameters

| Pathway                                 | $R_{\text{Fe-NO}}$<br>(Å) | $R_{\text{N-O}}$<br>(Å) | $R_{\text{B-H}}$<br>(Å) | $R_{\text{N-H}}$<br>(Å) | $R_{\text{Fe-H}}$<br>(Å) | $\angle \text{FeNO}$<br>(°) | $\angle \text{HNO}$<br>(°) | $\angle \text{NFeH}$<br>(°) |
|-----------------------------------------|---------------------------|-------------------------|-------------------------|-------------------------|--------------------------|-----------------------------|----------------------------|-----------------------------|
| N-Pathway                               |                           |                         |                         |                         |                          |                             |                            |                             |
| <b>R1</b>                               | 1.601                     | 1.120                   |                         |                         |                          | 179.9                       |                            |                             |
| <b>R2</b>                               |                           |                         | 1.232                   |                         |                          |                             |                            |                             |
| <b>I-1<sub>N</sub></b>                  | 1.615                     | 1.111                   | 1.230                   | 2.984                   |                          | 174.5                       | 73.4                       |                             |
| <b>TS<sub>N</sub></b>                   | 1.624                     | 1.113                   | 1.235                   | 2.441                   |                          | 167.3                       | 90.2                       |                             |
| <b>I-2<sub>N</sub></b>                  | 1.743                     | 1.209                   | 1.213                   | 1.042                   |                          | 130.9                       | 114.2                      |                             |
| <b>P-1<sub>N</sub></b>                  | 1.736                     | 1.214                   |                         | 1.036                   |                          | 131.5                       | 113.1                      |                             |
| <b>P2</b> <sup>a)</sup>                 |                           |                         | 1.313/<br>1.188         |                         |                          |                             |                            |                             |
| H-pathway                               |                           |                         |                         |                         |                          |                             |                            |                             |
| <b>I-1<sub>H</sub>/ I-2<sub>H</sub></b> | 1.671                     | 1.128                   | 1.327                   |                         | 1.594                    | 174.0                       |                            | 169.8                       |
| <b>TS<sub>H</sub></b>                   | 1.670                     | 1.128                   | 1.330                   |                         | 1.592                    | 175.2                       |                            | 172.0                       |
| <b>P-1<sub>H</sub></b>                  | 1.769                     | 1.152                   |                         |                         | 1.477                    | 155.2                       |                            | 165.4                       |

<sup>a)</sup> Bridging/terminal B-H bond lengths respectively.

Table S4. Charges of Selected Atoms and Groups (Unit: 'e')

| Pathway                 | $Q_{\text{Fe}}$ | $Q_{\text{BH3}}$ | $Q_{\text{H}}$ | $Q_{\text{N}}$ | $Q_{\text{O}}$ | $Q_{\text{Por}}$ |
|-------------------------|-----------------|------------------|----------------|----------------|----------------|------------------|
| <b>R1</b>               | 0.999           |                  |                | 0.101          | 0.063          | -0.163           |
| <b>R2</b>               |                 | -0.705           | -0.295         |                |                |                  |
| <b>TS-1<sub>N</sub></b> | 1.123           | -0.710           | -0.154         | 0.182          | 0.051          | -0.493           |
| <b>TS-1<sub>H</sub></b> | -0.020          | -0.469           | 0.121          | 0.261          | 0.020          | 0.087            |

Table S5. Bond Strength Energies (in kcal/mol)

| Ligand | Bond   | $\Delta E_{\text{SCF}}$ | $\Delta E_{\text{SCF+ZPE}}$ | $\Delta H$ | $\Delta G$ |
|--------|--------|-------------------------|-----------------------------|------------|------------|
| None   | Fe-NHO | 11.52                   | 7.98                        | 8.80       | -4.25      |
|        | H-NO   | 56.76                   | 48.91                       | 50.43      | 41.54      |
| 5-MeIm | Fe-NHO | 16.86                   | 11.37                       | 12.90      | -3.30      |
|        | H-NO   | 62.25                   | 54.34                       | 55.87      | 46.95      |

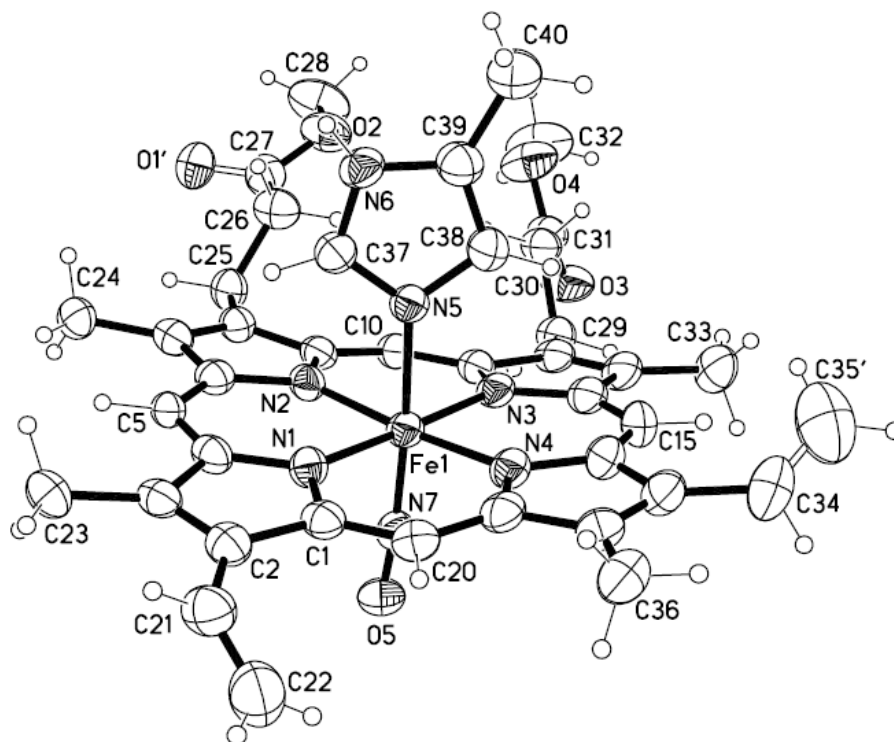

**Figure S3.** Molecular structure and atom labeling of the cation of [(PPDME)Fe(NO)(5-MeIm)]SbF<sub>6</sub>

### Experimental for X-ray structural determination of [(PPDME)Fe(NO)(5-MeIm)]SbF<sub>6</sub>

The sample was twinned by a 2-fold rotation about the [1 -1 0] axis. The twin ratio refined to 0.4655(12). Both the anion at Sb1B and the free organic cation were located on inversion centers. Oxygen O1 was disordered with refined occupancies of 0.67(6) and 0.33(6) for the unprimed and primed atoms. Atom C35 was disordered with refined occupancies of 0.649(17) and 0.351(17) for the unprimed and primed atoms. Both anion sites were disordered with refined occupancies of 0.705(9) and 0.295(9) for the A site atoms and 0.678(7) and 0.322(7) for the B site atoms. Restraints on the positions of all disordered atoms and the displacement parameters of all non-hydrogen atoms were required. The displacement ellipsoids were drawn at the 50% probability level.

A purple, block-shaped crystal of dimensions 0.20 x 0.08 x 0.06 mm was selected for

structural analysis. Intensity data for this compound were collected using a diffractometer with a Bruker APEX ccd area detector (1) and graphite-monochromated Mo K $\alpha$  radiation ( $\lambda = 0.71073$  Å). The sample was cooled to 100(2) K. Cell parameters were determined from a non-linear least squares fit of 9985 peaks in the range  $2.43 < \theta < 24.17^\circ$ . A total of 68484 data were measured in the range  $1.384 < \theta < 25.902^\circ$  using  $\phi$  and  $\omega$  oscillation frames. The data were corrected for absorption by the empirical method (2) giving minimum and maximum transmission factors of 0.779 and 0.925. The data were merged to form a set of 16006 independent data with  $R(\text{int}) = 0.0417$  and a coverage of 100.0 %. The triclinic space group  $P\bar{1}$  was determined by statistical tests and verified by subsequent refinement. The structure was solved by direct methods and refined by full-matrix least-squares methods on  $F^2$  (3). The positions of hydrogens bonded to carbons and imidazolium nitrogens were initially determined by geometry and were refined using a riding model. The hydrogen bonded to N6 was located on a difference map, and its position was refined independently. Non-hydrogen atoms were refined with anisotropic displacement parameters. Hydrogen atom displacement parameters were set to 1.2 (1.5 for methyl) times the isotropic equivalent displacement parameters of the bonded atoms. A total of 751 parameters were refined against 1337 restraints and 16006 data to give  $wR(F^2) = 0.1854$  and  $S = 1.010$  for weights of  $w = 1/[\sigma^2(F^2) + (0.1100 P)^2 + 1.4500 P]$ , where  $P = [F_o^2 + 2F_c^2] / 3$ . The final  $R(F)$  was 0.0646 for the 11046 observed,  $[F > 4\sigma(F)]$ , data. The largest shift/s.u. was 0.000 in the final refinement cycle. The final difference map had maxima and minima of 1.234 and -0.560 e/Å<sup>3</sup>, respectively.

### Acknowledgment

The authors thank the National Science Foundation (grant CHE-0130835) and the University of Oklahoma for funds to purchase of the X-ray instrument and computers. This structure was determined by Douglas R. Powell.

### References

- (1) (a) Data Collection: APEX2 (2007) Bruker AXS Inc., Madison, Wisconsin, USA. (b) Data Reduction: SAINT (2007) Bruker AXS Inc., Madison, Wisconsin, USA.
- (2) L. Krause, R. Herbst-Irmer, G. M. Sheldrick, and D. Stalke (2015). *J. Appl. Cryst.*, **48**, 3-10.
- (3) (a) G. M. Sheldrick. *Acta Cryst.* **2015**, *A71*, 3-8. (b) G. M. Sheldrick. *Acta Cryst.* **2015**, *C71*, 3-8.

### Deposition of the crystal structure with the CCDC

CCDC 1484724 contains the supplementary crystallographic data. These data can be obtained free of charge from the Cambridge Crystallographic Data Center via <http://www.ccdc.cam.ac.uk/conts/retrieving.html>

Table S6. Crystal data and structure refinement for [(PPDME)Fe(NO)(5-MeIm)]SbF<sub>6</sub>·0.5[C<sub>4</sub>H<sub>7</sub>H<sub>2</sub>]SbF<sub>6</sub>.

|                                             |                                                                                                                                                                                                                                                                                            |                         |
|---------------------------------------------|--------------------------------------------------------------------------------------------------------------------------------------------------------------------------------------------------------------------------------------------------------------------------------------------|-------------------------|
| Empirical formula                           | (C <sub>40</sub> H <sub>42</sub> FeN <sub>7</sub> O <sub>5</sub> ) <sup>+</sup> 0.5(C <sub>4</sub> H <sub>7</sub> N <sub>2</sub> ) <sup>+</sup> 1.5(SbF <sub>6</sub> ) <sup>-</sup><br>C <sub>42</sub> H <sub>45.5</sub> F <sub>9</sub> Fe N <sub>8</sub> O <sub>5</sub> Sb <sub>1.5</sub> |                         |
| Formula weight                              | 1151.84                                                                                                                                                                                                                                                                                    |                         |
| Crystal system                              | triclinic                                                                                                                                                                                                                                                                                  |                         |
| Space group                                 | <i>P</i> $\bar{1}$                                                                                                                                                                                                                                                                         |                         |
| Unit cell dimensions                        | <i>a</i> = 12.0388(10) Å                                                                                                                                                                                                                                                                   | $\alpha$ = 67.9924(14)° |
|                                             | <i>b</i> = 14.0169(12) Å                                                                                                                                                                                                                                                                   | $\beta$ = 68.7999(14)°  |
|                                             | <i>c</i> = 16.3482(14) Å                                                                                                                                                                                                                                                                   | $\gamma$ = 64.7066(14)° |
| Volume                                      | 2244.7(3) Å <sup>3</sup>                                                                                                                                                                                                                                                                   |                         |
| Z, Z'                                       | 2, 1                                                                                                                                                                                                                                                                                       |                         |
| Density (calculated)                        | 1.704 Mg/m <sup>3</sup>                                                                                                                                                                                                                                                                    |                         |
| Wavelength                                  | 0.71073 Å                                                                                                                                                                                                                                                                                  |                         |
| Temperature                                 | 100(2) K                                                                                                                                                                                                                                                                                   |                         |
| <i>F</i> (000)                              | 1154                                                                                                                                                                                                                                                                                       |                         |
| Absorption coefficient                      | 1.311 mm <sup>-1</sup>                                                                                                                                                                                                                                                                     |                         |
| Absorption correction                       | semi-empirical from equivalents                                                                                                                                                                                                                                                            |                         |
| Max. and min. transmission                  | 0.925 and 0.779                                                                                                                                                                                                                                                                            |                         |
| Theta range for data collection             | 1.384 to 25.902°                                                                                                                                                                                                                                                                           |                         |
| Reflections collected                       | 68484                                                                                                                                                                                                                                                                                      |                         |
| Independent reflections                     | 16006 [R(int) = 0.0417]                                                                                                                                                                                                                                                                    |                         |
| Data / restraints / parameters              | 16006 / 1337 / 751                                                                                                                                                                                                                                                                         |                         |
| <i>wR</i> ( <i>F</i> <sup>2</sup> all data) | <i>wR</i> 2 = 0.1854                                                                                                                                                                                                                                                                       |                         |
| <i>R</i> ( <i>F</i> obsd data)              | <i>R</i> 1 = 0.0646                                                                                                                                                                                                                                                                        |                         |
| Goodness-of-fit on <i>F</i> <sup>2</sup>    | 1.010                                                                                                                                                                                                                                                                                      |                         |
| Observed data [ <i>I</i> > 2σ( <i>I</i> )]  | 11046                                                                                                                                                                                                                                                                                      |                         |
| Largest and mean shift / s.u.               | 0.000 and 0.000                                                                                                                                                                                                                                                                            |                         |
| Largest diff. peak and hole                 | 1.234 and -0.560 e/Å <sup>3</sup>                                                                                                                                                                                                                                                          |                         |

---


$$wR2 = \{ \sum [w(F_o^2 - F_c^2)^2] / \sum [w(F_o^2)^2] \}^{1/2}$$

$$R1 = \sum ||F_o| - |F_c|| / \sum |F_o|$$

Table S7. Bond lengths [ $\text{\AA}$ ] and angles [ $^\circ$ ] for  $[(\text{PPDME})\text{Fe}(\text{NO})(5\text{-MeIm})]1.5\text{SbF}_6 \cdot 0.5(\text{C}_4\text{H}_7\text{H}_2)^+$ .

|             |           |              |           |
|-------------|-----------|--------------|-----------|
| Fe(1)-N(7)  | 1.654(5)  | C(10)-C(11)  | 1.375(9)  |
| Fe(1)-N(5)  | 1.990(5)  | C(10)-H(10)  | 0.9500    |
| Fe(1)-N(3)  | 1.996(5)  | C(11)-C(12)  | 1.449(8)  |
| Fe(1)-N(2)  | 1.998(5)  | C(12)-C(13)  | 1.339(9)  |
| Fe(1)-N(4)  | 1.999(5)  | C(12)-C(29)  | 1.518(9)  |
| Fe(1)-N(1)  | 2.007(5)  | C(13)-C(14)  | 1.454(9)  |
| O(1)-C(27)  | 1.227(10) | C(13)-C(33)  | 1.501(9)  |
| O(1')-C(27) | 1.225(10) | C(14)-C(15)  | 1.373(9)  |
| O(2)-C(27)  | 1.313(8)  | C(15)-C(16)  | 1.378(9)  |
| O(2)-C(28)  | 1.436(8)  | C(15)-H(15)  | 0.9500    |
| O(3)-C(31)  | 1.211(8)  | C(16)-C(17)  | 1.445(9)  |
| O(4)-C(31)  | 1.320(8)  | C(17)-C(18)  | 1.374(9)  |
| O(4)-C(32)  | 1.446(8)  | C(17)-C(34)  | 1.472(10) |
| O(5)-N(7)   | 1.133(6)  | C(18)-C(19)  | 1.441(9)  |
| N(1)-C(4)   | 1.368(7)  | C(18)-C(36)  | 1.480(9)  |
| N(1)-C(1)   | 1.373(7)  | C(19)-C(20)  | 1.373(8)  |
| N(2)-C(9)   | 1.361(7)  | C(20)-H(20)  | 0.9500    |
| N(2)-C(6)   | 1.392(7)  | C(21)-C(22)  | 1.272(10) |
| N(3)-C(14)  | 1.376(8)  | C(21)-H(21)  | 0.9500    |
| N(3)-C(11)  | 1.381(8)  | C(22)-H(22A) | 0.9500    |
| N(4)-C(16)  | 1.378(7)  | C(22)-H(22B) | 0.9500    |
| N(4)-C(19)  | 1.382(8)  | C(23)-H(23A) | 0.9800    |
| N(5)-C(37)  | 1.311(7)  | C(23)-H(23B) | 0.9800    |
| N(5)-C(38)  | 1.382(8)  | C(23)-H(23C) | 0.9800    |
| N(6)-C(37)  | 1.334(8)  | C(24)-H(24A) | 0.9800    |
| N(6)-C(39)  | 1.364(8)  | C(24)-H(24B) | 0.9800    |
| N(6)-H(6)   | 0.85(7)   | C(24)-H(24C) | 0.9800    |
| C(1)-C(20)  | 1.382(8)  | C(25)-C(26)  | 1.522(9)  |
| C(1)-C(2)   | 1.448(8)  | C(25)-H(25A) | 0.9900    |
| C(2)-C(3)   | 1.359(9)  | C(25)-H(25B) | 0.9900    |
| C(2)-C(21)  | 1.467(9)  | C(26)-C(27)  | 1.492(9)  |
| C(3)-C(4)   | 1.450(8)  | C(26)-H(26A) | 0.9900    |
| C(3)-C(23)  | 1.499(8)  | C(26)-H(26B) | 0.9900    |
| C(4)-C(5)   | 1.389(8)  | C(28)-H(28A) | 0.9800    |
| C(5)-C(6)   | 1.394(8)  | C(28)-H(28B) | 0.9800    |
| C(5)-H(5)   | 0.9500    | C(28)-H(28C) | 0.9800    |
| C(6)-C(7)   | 1.435(8)  | C(29)-C(30)  | 1.526(8)  |
| C(7)-C(8)   | 1.372(8)  | C(29)-H(29A) | 0.9900    |
| C(7)-C(24)  | 1.495(8)  | C(29)-H(29B) | 0.9900    |
| C(8)-C(9)   | 1.452(8)  | C(30)-C(31)  | 1.498(9)  |
| C(8)-C(25)  | 1.496(8)  | C(30)-H(30A) | 0.9900    |
| C(9)-C(10)  | 1.387(8)  | C(30)-H(30B) | 0.9900    |



|                 |            |                  |           |
|-----------------|------------|------------------|-----------|
| C(32)-H(32A)    | 0.9800     | Sb(1')-F(6A')    | 1.838(6)  |
| C(32)-H(32B)    | 0.9800     | Sb(1')-F(5A')    | 1.840(6)  |
| C(32)-H(32C)    | 0.9800     | Sb(1')-F(2A')    | 1.884(7)  |
| C(33)-H(33A)    | 0.9800     | Sb(1')-F(3A')    | 1.885(7)  |
| C(33)-H(33B)    | 0.9800     | Sb(1')-F(1A')    | 1.886(7)  |
| C(33)-H(33C)    | 0.9800     | Sb(1B)-F(1B')#1  | 1.818(12) |
| C(34)-C(35')    | 1.254(12)  | Sb(1B)-F(1B')    | 1.818(12) |
| C(34)-C(35)     | 1.261(12)  | Sb(1B)-F(2B)#1   | 1.856(4)  |
| C(34)-H(34)     | 0.9500     | Sb(1B)-F(2B)     | 1.856(4)  |
| C(34)-H(34')    | 0.9500     | Sb(1B)-F(2B')#1  | 1.856(14) |
| C(35)-H(35A)    | 0.9500     | Sb(1B)-F(2B')    | 1.856(14) |
| C(35)-H(35B)    | 0.9500     | Sb(1B)-F(3B')    | 1.857(14) |
| C(35')-H(35C)   | 0.9500     | Sb(1B)-F(3B')#1  | 1.857(14) |
| C(35')-H(35D)   | 0.9500     | Sb(1B)-F(1B)#1   | 1.860(3)  |
| C(36)-H(36A)    | 0.9800     | Sb(1B)-F(1B)     | 1.860(3)  |
| C(36)-H(36B)    | 0.9800     | Sb(1B)-F(3B)#1   | 1.863(4)  |
| C(36)-H(36C)    | 0.9800     | Sb(1B)-F(3B)     | 1.863(4)  |
| C(37)-H(37)     | 0.9500     | N(1C)-C(5C)      | 1.33(2)   |
| C(38)-C(39)     | 1.359(9)   | N(1C)-C(2C)      | 1.39(2)   |
| C(38)-H(38)     | 0.9500     | N(1C)-H(1C)      | 0.8800    |
| C(39)-C(40)     | 1.500(9)   | C(2C)-N(3C)      | 1.31(2)   |
| C(40)-H(40A)    | 0.9800     | C(2C)-H(2C)      | 0.9500    |
| C(40)-H(40B)    | 0.9800     | N(3C)-C(4C)      | 1.33(3)   |
| C(40)-H(40C)    | 0.9800     | N(3C)-H(3C)      | 0.8800    |
| Sb(1A)-F(3A)    | 1.859(3)   | C(4C)-C(5C)      | 1.41(3)   |
| Sb(1A)-F(4A)    | 1.859(3)   | C(4C)-H(4C)      | 0.9500    |
| Sb(1A)-F(1A)    | 1.861(3)   | C(5C)-C(6C)      | 1.51(2)   |
| Sb(1A)-F(5A)    | 1.862(3)   | C(6C)-H(6CA)     | 0.9800    |
| Sb(1A)-F(2A)    | 1.862(3)   | C(6C)-H(6CB)     | 0.9800    |
| Sb(1A)-F(6A)    | 1.866(3)   | C(6C)-H(6CC)     | 0.9800    |
| Sb(1')-F(4A')   | 1.837(6)   |                  |           |
|                 |            |                  |           |
| N(7)-Fe(1)-N(5) | 176.4(2)   | N(2)-Fe(1)-N(1)  | 89.75(19) |
| N(7)-Fe(1)-N(3) | 92.2(2)    | N(4)-Fe(1)-N(1)  | 90.4(2)   |
| N(5)-Fe(1)-N(3) | 89.99(19)  | C(27)-O(2)-C(28) | 116.4(6)  |
| N(7)-Fe(1)-N(2) | 89.8(2)    | C(31)-O(4)-C(32) | 116.4(6)  |
| N(5)-Fe(1)-N(2) | 87.27(19)  | C(4)-N(1)-C(1)   | 106.3(5)  |
| N(3)-Fe(1)-N(2) | 90.4(2)    | C(4)-N(1)-Fe(1)  | 127.2(4)  |
| N(7)-Fe(1)-N(4) | 95.1(2)    | C(1)-N(1)-Fe(1)  | 126.4(4)  |
| N(5)-Fe(1)-N(4) | 87.8(2)    | C(9)-N(2)-C(6)   | 106.1(5)  |
| N(3)-Fe(1)-N(4) | 89.3(2)    | C(9)-N(2)-Fe(1)  | 126.4(4)  |
| N(2)-Fe(1)-N(4) | 175.05(19) | C(6)-N(2)-Fe(1)  | 127.5(4)  |
| N(7)-Fe(1)-N(1) | 90.1(2)    | C(14)-N(3)-C(11) | 105.7(5)  |
| N(5)-Fe(1)-N(1) | 87.71(19)  | C(14)-N(3)-Fe(1) | 127.9(4)  |
| N(3)-Fe(1)-N(1) | 177.69(19) | C(11)-N(3)-Fe(1) | 125.8(4)  |

|                   |          |                     |          |
|-------------------|----------|---------------------|----------|
| C(16)-N(4)-C(19)  | 106.4(5) | C(11)-C(12)-C(29)   | 124.6(6) |
| C(16)-N(4)-Fe(1)  | 127.5(4) | C(12)-C(13)-C(14)   | 106.8(6) |
| C(19)-N(4)-Fe(1)  | 126.1(4) | C(12)-C(13)-C(33)   | 129.0(6) |
| C(37)-N(5)-C(38)  | 106.1(5) | C(14)-C(13)-C(33)   | 124.1(6) |
| C(37)-N(5)-Fe(1)  | 125.6(4) | C(15)-C(14)-N(3)    | 124.7(6) |
| C(38)-N(5)-Fe(1)  | 128.3(4) | C(15)-C(14)-C(13)   | 125.2(6) |
| C(37)-N(6)-C(39)  | 108.5(5) | N(3)-C(14)-C(13)    | 110.1(6) |
| C(37)-N(6)-H(6)   | 128(5)   | C(14)-C(15)-C(16)   | 125.5(6) |
| C(39)-N(6)-H(6)   | 123(5)   | C(14)-C(15)-H(15)   | 117.2    |
| O(5)-N(7)-Fe(1)   | 174.8(5) | C(16)-C(15)-H(15)   | 117.2    |
| N(1)-C(1)-C(20)   | 124.9(6) | N(4)-C(16)-C(15)    | 124.8(6) |
| N(1)-C(1)-C(2)    | 110.0(5) | N(4)-C(16)-C(17)    | 109.8(5) |
| C(20)-C(1)-C(2)   | 124.8(6) | C(15)-C(16)-C(17)   | 125.4(6) |
| C(3)-C(2)-C(1)    | 106.7(5) | C(18)-C(17)-C(16)   | 107.1(6) |
| C(3)-C(2)-C(21)   | 126.4(6) | C(18)-C(17)-C(34)   | 129.1(6) |
| C(1)-C(2)-C(21)   | 126.9(6) | C(16)-C(17)-C(34)   | 123.8(6) |
| C(2)-C(3)-C(4)    | 106.7(5) | C(17)-C(18)-C(19)   | 106.5(6) |
| C(2)-C(3)-C(23)   | 129.1(5) | C(17)-C(18)-C(36)   | 128.7(6) |
| C(4)-C(3)-C(23)   | 124.1(6) | C(19)-C(18)-C(36)   | 124.8(6) |
| N(1)-C(4)-C(5)    | 126.4(5) | C(20)-C(19)-N(4)    | 125.8(6) |
| N(1)-C(4)-C(3)    | 110.1(5) | C(20)-C(19)-C(18)   | 123.9(6) |
| C(5)-C(4)-C(3)    | 123.5(6) | N(4)-C(19)-C(18)    | 110.2(6) |
| C(4)-C(5)-C(6)    | 123.9(5) | C(19)-C(20)-C(1)    | 125.3(6) |
| C(4)-C(5)-H(5)    | 118.1    | C(19)-C(20)-H(20)   | 117.3    |
| C(6)-C(5)-H(5)    | 118.1    | C(1)-C(20)-H(20)    | 117.3    |
| N(2)-C(6)-C(5)    | 125.0(5) | C(22)-C(21)-C(2)    | 128.0(7) |
| N(2)-C(6)-C(7)    | 109.8(5) | C(22)-C(21)-H(21)   | 116.0    |
| C(5)-C(6)-C(7)    | 125.1(6) | C(2)-C(21)-H(21)    | 116.0    |
| C(8)-C(7)-C(6)    | 107.2(5) | C(21)-C(22)-H(22A)  | 120.0    |
| C(8)-C(7)-C(24)   | 128.4(5) | C(21)-C(22)-H(22B)  | 120.0    |
| C(6)-C(7)-C(24)   | 124.4(5) | H(22A)-C(22)-H(22B) | 120.0    |
| C(7)-C(8)-C(9)    | 106.1(5) | C(3)-C(23)-H(23A)   | 109.5    |
| C(7)-C(8)-C(25)   | 129.1(6) | C(3)-C(23)-H(23B)   | 109.5    |
| C(9)-C(8)-C(25)   | 124.8(5) | H(23A)-C(23)-H(23B) | 109.5    |
| N(2)-C(9)-C(10)   | 125.5(6) | C(3)-C(23)-H(23C)   | 109.5    |
| N(2)-C(9)-C(8)    | 110.6(5) | H(23A)-C(23)-H(23C) | 109.5    |
| C(10)-C(9)-C(8)   | 123.8(6) | H(23B)-C(23)-H(23C) | 109.5    |
| C(11)-C(10)-C(9)  | 125.0(6) | C(7)-C(24)-H(24A)   | 109.5    |
| C(11)-C(10)-H(10) | 117.5    | C(7)-C(24)-H(24B)   | 109.5    |
| C(9)-C(10)-H(10)  | 117.5    | H(24A)-C(24)-H(24B) | 109.5    |
| C(10)-C(11)-N(3)  | 125.1(5) | C(7)-C(24)-H(24C)   | 109.5    |
| C(10)-C(11)-C(12) | 125.0(6) | H(24A)-C(24)-H(24C) | 109.5    |
| N(3)-C(11)-C(12)  | 109.7(6) | H(24B)-C(24)-H(24C) | 109.5    |
| C(13)-C(12)-C(11) | 107.6(6) | C(8)-C(25)-C(26)    | 111.9(5) |
| C(13)-C(12)-C(29) | 127.7(6) | C(8)-C(25)-H(25A)   | 109.2    |

|                     |           |                      |           |
|---------------------|-----------|----------------------|-----------|
| C(26)-C(25)-H(25A)  | 109.2     | C(13)-C(33)-H(33C)   | 109.5     |
| C(8)-C(25)-H(25B)   | 109.2     | H(33A)-C(33)-H(33C)  | 109.5     |
| C(26)-C(25)-H(25B)  | 109.2     | H(33B)-C(33)-H(33C)  | 109.5     |
| H(25A)-C(25)-H(25B) | 107.9     | C(35')-C(34)-C(17)   | 130.1(17) |
| C(27)-C(26)-C(25)   | 112.8(6)  | C(35)-C(34)-C(17)    | 126.7(9)  |
| C(27)-C(26)-H(26A)  | 109.0     | C(35)-C(34)-H(34)    | 116.6     |
| C(25)-C(26)-H(26A)  | 109.0     | C(17)-C(34)-H(34)    | 116.6     |
| C(27)-C(26)-H(26B)  | 109.0     | C(35')-C(34)-H(34')  | 114.9     |
| C(25)-C(26)-H(26B)  | 109.0     | C(17)-C(34)-H(34')   | 114.9     |
| H(26A)-C(26)-H(26B) | 107.8     | C(34)-C(35)-H(35A)   | 120.0     |
| O(1')-C(27)-O(2)    | 124.8(11) | C(34)-C(35)-H(35B)   | 120.0     |
| O(1)-C(27)-O(2)     | 119.2(10) | H(35A)-C(35)-H(35B)  | 120.0     |
| O(1')-C(27)-C(26)   | 115.2(14) | C(34)-C(35')-H(35C)  | 120.0     |
| O(1)-C(27)-C(26)    | 126.4(8)  | C(34)-C(35')-H(35D)  | 120.0     |
| O(2)-C(27)-C(26)    | 113.2(7)  | H(35C)-C(35')-H(35D) | 120.0     |
| O(2)-C(28)-H(28A)   | 109.5     | C(18)-C(36)-H(36A)   | 109.5     |
| O(2)-C(28)-H(28B)   | 109.5     | C(18)-C(36)-H(36B)   | 109.5     |
| H(28A)-C(28)-H(28B) | 109.5     | H(36A)-C(36)-H(36B)  | 109.5     |
| O(2)-C(28)-H(28C)   | 109.5     | C(18)-C(36)-H(36C)   | 109.5     |
| H(28A)-C(28)-H(28C) | 109.5     | H(36A)-C(36)-H(36C)  | 109.5     |
| H(28B)-C(28)-H(28C) | 109.5     | H(36B)-C(36)-H(36C)  | 109.5     |
| C(12)-C(29)-C(30)   | 114.5(5)  | N(5)-C(37)-N(6)      | 110.7(6)  |
| C(12)-C(29)-H(29A)  | 108.6     | N(5)-C(37)-H(37)     | 124.6     |
| C(30)-C(29)-H(29A)  | 108.6     | N(6)-C(37)-H(37)     | 124.6     |
| C(12)-C(29)-H(29B)  | 108.6     | C(39)-C(38)-N(5)     | 109.1(6)  |
| C(30)-C(29)-H(29B)  | 108.6     | C(39)-C(38)-H(38)    | 125.5     |
| H(29A)-C(29)-H(29B) | 107.6     | N(5)-C(38)-H(38)     | 125.5     |
| C(31)-C(30)-C(29)   | 111.4(5)  | C(38)-C(39)-N(6)     | 105.5(6)  |
| C(31)-C(30)-H(30A)  | 109.4     | C(38)-C(39)-C(40)    | 132.7(7)  |
| C(29)-C(30)-H(30A)  | 109.4     | N(6)-C(39)-C(40)     | 121.8(6)  |
| C(31)-C(30)-H(30B)  | 109.4     | C(39)-C(40)-H(40A)   | 109.5     |
| C(29)-C(30)-H(30B)  | 109.4     | C(39)-C(40)-H(40B)   | 109.5     |
| H(30A)-C(30)-H(30B) | 108.0     | H(40A)-C(40)-H(40B)  | 109.5     |
| O(3)-C(31)-O(4)     | 122.6(6)  | C(39)-C(40)-H(40C)   | 109.5     |
| O(3)-C(31)-C(30)    | 125.2(6)  | H(40A)-C(40)-H(40C)  | 109.5     |
| O(4)-C(31)-C(30)    | 112.2(5)  | H(40B)-C(40)-H(40C)  | 109.5     |
| O(4)-C(32)-H(32A)   | 109.5     | F(3A)-Sb(1A)-F(4A)   | 90.85(18) |
| O(4)-C(32)-H(32B)   | 109.5     | F(3A)-Sb(1A)-F(1A)   | 90.38(19) |
| H(32A)-C(32)-H(32B) | 109.5     | F(4A)-Sb(1A)-F(1A)   | 178.7(2)  |
| O(4)-C(32)-H(32C)   | 109.5     | F(3A)-Sb(1A)-F(5A)   | 89.71(18) |
| H(32A)-C(32)-H(32C) | 109.5     | F(4A)-Sb(1A)-F(5A)   | 90.18(19) |
| H(32B)-C(32)-H(32C) | 109.5     | F(1A)-Sb(1A)-F(5A)   | 90.36(19) |
| C(13)-C(33)-H(33A)  | 109.5     | F(3A)-Sb(1A)-F(2A)   | 89.98(18) |
| C(13)-C(33)-H(33B)  | 109.5     | F(4A)-Sb(1A)-F(2A)   | 89.86(19) |
| H(33A)-C(33)-H(33B) | 109.5     | F(1A)-Sb(1A)-F(2A)   | 89.61(18) |

|                          |           |                      |           |
|--------------------------|-----------|----------------------|-----------|
| F(5A)-Sb(1A)-F(2A)       | 179.7(2)  | F(1B)-Sb(1B)-F(3B)#1 | 89.3(4)   |
| F(3A)-Sb(1A)-F(6A)       | 179.1(2)  | F(2B)#1-Sb(1B)-F(3B) | 91.8(5)   |
| F(4A)-Sb(1A)-F(6A)       | 89.52(18) | F(2B)-Sb(1B)-F(3B)   | 88.2(5)   |
| F(1A)-Sb(1A)-F(6A)       | 89.25(17) | F(1B)#1-Sb(1B)-F(3B) | 89.3(4)   |
| F(5A)-Sb(1A)-F(6A)       | 89.49(18) | F(1B)-Sb(1B)-F(3B)   | 90.7(4)   |
| F(2A)-Sb(1A)-F(6A)       | 90.82(18) | F(3B)#1-Sb(1B)-F(3B) | 180.0     |
| F(4A')-Sb(1')-F(6A')     | 91.7(4)   | C(5C)-N(1C)-C(2C)    | 107.5(16) |
| F(4A')-Sb(1')-F(5A')     | 91.5(4)   | C(5C)-N(1C)-H(1C)    | 126.3     |
| F(6A')-Sb(1')-F(5A')     | 91.2(4)   | C(2C)-N(1C)-H(1C)    | 126.3     |
| F(4A')-Sb(1')-F(2A')     | 90.0(2)   | N(3C)-C(2C)-N(1C)    | 111.8(15) |
| F(6A')-Sb(1')-F(2A')     | 90.0(2)   | N(3C)-C(2C)-H(2C)    | 124.1     |
| F(5A')-Sb(1')-F(2A')     | 178.1(5)  | N(1C)-C(2C)-H(2C)    | 124.1     |
| F(4A')-Sb(1')-F(3A')     | 90.0(2)   | C(2C)-N(3C)-C(4C)    | 103.7(17) |
| F(6A')-Sb(1')-F(3A')     | 177.9(5)  | C(2C)-N(3C)-H(3C)    | 128.1     |
| F(5A')-Sb(1')-F(3A')     | 90.0(2)   | C(4C)-N(3C)-H(3C)    | 128.1     |
| F(2A')-Sb(1')-F(3A')     | 88.7(4)   | N(3C)-C(4C)-C(5C)    | 113(2)    |
| F(4A')-Sb(1')-F(1A')     | 178.0(5)  | N(3C)-C(4C)-H(4C)    | 123.6     |
| F(6A')-Sb(1')-F(1A')     | 89.9(2)   | C(5C)-C(4C)-H(4C)    | 123.6     |
| F(5A')-Sb(1')-F(1A')     | 89.8(2)   | N(1C)-C(5C)-C(4C)    | 103.6(16) |
| F(2A')-Sb(1')-F(1A')     | 88.7(4)   | N(1C)-C(5C)-C(6C)    | 130.8(18) |
| F(3A')-Sb(1')-F(1A')     | 88.3(4)   | C(4C)-C(5C)-C(6C)    | 125.6(18) |
| F(1B')#1-Sb(1B)-F(1B')   | 180.0     | C(5C)-C(6C)-H(6CA)   | 109.5     |
| F(2B)#1-Sb(1B)-F(2B)     | 180.0(7)  | C(5C)-C(6C)-H(6CB)   | 109.5     |
| F(1B')#1-Sb(1B)-F(2B')#1 | 91.6(6)   | H(6CA)-C(6C)-H(6CB)  | 109.5     |
| F(1B')-Sb(1B)-F(2B')#1   | 88.4(6)   | C(5C)-C(6C)-H(6CC)   | 109.5     |
| F(1B')#1-Sb(1B)-F(2B')   | 88.4(6)   | H(6CA)-C(6C)-H(6CC)  | 109.5     |
| F(1B')-Sb(1B)-F(2B')     | 91.6(6)   | H(6CB)-C(6C)-H(6CC)  | 109.5     |
| F(2B')#1-Sb(1B)-F(2B')   | 180.0     |                      |           |
| F(1B')#1-Sb(1B)-F(3B')   | 88.6(6)   |                      |           |
| F(1B')-Sb(1B)-F(3B')     | 91.4(6)   |                      |           |
| F(2B')#1-Sb(1B)-F(3B')   | 89.7(5)   |                      |           |
| F(2B')-Sb(1B)-F(3B')     | 90.3(5)   |                      |           |
| F(1B')#1-Sb(1B)-F(3B')#1 | 91.4(6)   |                      |           |
| F(1B')-Sb(1B)-F(3B')#1   | 88.6(6)   |                      |           |
| F(2B')#1-Sb(1B)-F(3B')#1 | 90.3(5)   |                      |           |
| F(2B')-Sb(1B)-F(3B')#1   | 89.7(5)   |                      |           |
| F(3B')-Sb(1B)-F(3B')#1   | 180.0(12) |                      |           |
| F(2B)#1-Sb(1B)-F(1B)#1   | 90.6(4)   |                      |           |
| F(2B)-Sb(1B)-F(1B)#1     | 89.4(4)   |                      |           |
| F(2B)#1-Sb(1B)-F(1B)     | 89.4(4)   |                      |           |
| F(2B)-Sb(1B)-F(1B)       | 90.6(4)   |                      |           |
| F(1B)#1-Sb(1B)-F(1B)     | 180.0(6)  |                      |           |
| F(2B)#1-Sb(1B)-F(3B)#1   | 88.2(5)   |                      |           |
| F(2B)-Sb(1B)-F(3B)#1     | 91.8(5)   |                      |           |
| F(1B)#1-Sb(1B)-F(3B)#1   | 90.7(4)   |                      |           |

---

Symmetry transformations used to  
generate equivalent atoms:  
#1 -x+2, -y+1, -z+2

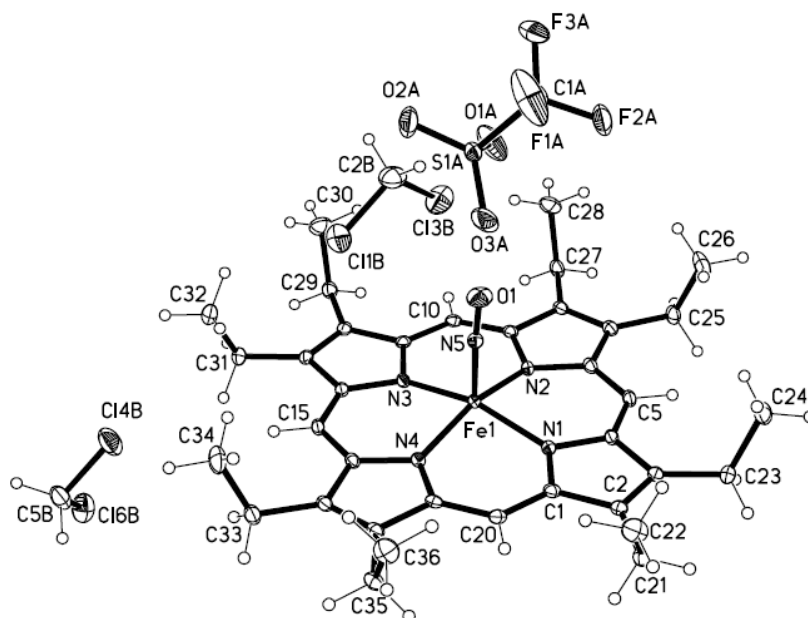

**Figure S4.** Molecular structure of [(OEP)Fe(NO)]OTf

### Experimental for X-ray structural determination of [(OEP)Fe(NO)]OTf

The selected crystal was a 4-component twin. The intensity data were effectively detwinned by the integration and scaling programs. The displacement ellipsoids were drawn at the 50% probability level.

A red block-shaped crystal of dimensions 0.500 x 0.240 x 0.180 mm was selected for structural analysis. Intensity data for this compound were collected using a diffractometer with a Bruker APEX ccd area detector (1) and graphite-monochromated Mo K $\alpha$  radiation ( $\lambda = 0.71073 \text{ \AA}$ ). The sample was cooled to 100(2) K. Cell parameters were determined from a non-linear least squares fit of 9982 peaks in the range  $2.26 < \theta < 27.58^\circ$ . A total of 91,295 data were measured in the range  $1.570 < \theta < 27.753^\circ$  using  $\phi$  and  $\omega$  oscillation frames. The data were corrected for absorption by the empirical method (2) giving minimum and maximum transmission factors of 0.714 and 0.881. The data were merged to form a set of 9460 independent data with  $R(\text{int}) = 0.0571$  and a coverage of 97.9 %.

The triclinic space group  $P\bar{1}$  was determined by statistical tests and verified by

subsequent refinement. The structure was solved by direct methods and refined by full-matrix least-squares methods on  $F^2$  (3). The positions of hydrogens were initially determined by geometry and were refined using a riding model. Non-hydrogen atoms were refined with anisotropic displacement parameters. Hydrogen atom displacement parameters were set to 1.2 (1.5 for methyl) times the isotropic equivalent displacement parameters of the bonded atoms. A total of 514 parameters were refined against 9460 data to give  $wR(F^2) = 0.0902$  and  $S = 1.000$  for weights of  $w = 1/[\sigma^2(F^2) + (0.0360 P)^2]$ , where  $P = [F_o^2 + 2F_c^2] / 3$ . The final  $R(F)$  was 0.0358 for the 7049 observed,  $[F > 4\sigma(F)]$ , data. The largest shift/s.u. was 0.001 in the final refinement cycle. The final difference map had maxima and minima of 0.587 and -0.425 e/Å<sup>3</sup>, respectively.

### Acknowledgment

The authors thank the National Science Foundation (grant CHE-0130835) and the University of Oklahoma for funds to purchase of the X-ray instrument and computers. This structure was determined by Douglas R. Powell.

### References

- (1) (a) Data Collection: APEX2 (2007) Bruker AXS Inc., Madison, Wisconsin, USA. (b) Data Reduction: SAINT (2007) Bruker AXS Inc., Madison, Wisconsin, USA.
- (2) SADABS (2002) Bruker AXS Inc., Madison, Wisconsin, USA.
- (3) (a) G. M. Sheldrick. *Acta Cryst.* **2015**, *A71*, 3-8. (b) G. M. Sheldrick. *Acta Cryst.* **2015**, *C71*, 3-8.

### Deposition of the crystal structure with the CCDC

CCDC 1484725 contains the supplementary crystallographic data. These data can be obtained free of charge from the Cambridge Crystallographic Data Center via <http://www.ccdc.cam.ac.uk/conts/retrieving.html>

Table S8. Crystal data and structure refinement for [(OEP)Fe(NO)]OTf.2(CH<sub>2</sub>Cl<sub>2</sub>).

|                                                                                  |                                                                                                                                                          |                        |
|----------------------------------------------------------------------------------|----------------------------------------------------------------------------------------------------------------------------------------------------------|------------------------|
| Empirical formula                                                                | (C <sub>36</sub> H <sub>44</sub> Fe N <sub>5</sub> O) <sup>+</sup> (C F <sub>3</sub> O <sub>3</sub> S) <sup>-</sup> 2(C H <sub>2</sub> Cl <sub>2</sub> ) |                        |
|                                                                                  | C <sub>39</sub> H <sub>48</sub> Cl <sub>4</sub> F <sub>3</sub> Fe N <sub>5</sub> O <sub>4</sub> S                                                        |                        |
| Formula weight                                                                   | 937.53                                                                                                                                                   |                        |
| Crystal system                                                                   | triclinic                                                                                                                                                |                        |
| Space group                                                                      | <i>P</i> $\bar{1}$                                                                                                                                       |                        |
| Unit cell dimensions                                                             | <i>a</i> = 12.424(2) Å                                                                                                                                   | $\alpha$ = 100.515(3)° |
|                                                                                  | <i>b</i> = 13.832(3) Å                                                                                                                                   | $\beta$ = 112.954(3)°  |
|                                                                                  | <i>c</i> = 15.083(3) Å                                                                                                                                   | $\gamma$ = 109.155(3)° |
| Volume                                                                           | 2106.1(7) Å <sup>3</sup>                                                                                                                                 |                        |
| Z, Z'                                                                            | 2, 1                                                                                                                                                     |                        |
| Density (calculated)                                                             | 1.478 Mg/m <sup>3</sup>                                                                                                                                  |                        |
| Wavelength                                                                       | 0.71073 Å                                                                                                                                                |                        |
| Temperature                                                                      | 100(2) K                                                                                                                                                 |                        |
| <i>F</i> (000)                                                                   | 972                                                                                                                                                      |                        |
| Absorption coefficient                                                           | 0.721 mm <sup>-1</sup>                                                                                                                                   |                        |
| Absorption correction                                                            | semi-empirical from equivalents                                                                                                                          |                        |
| Max. and min. transmission                                                       | 0.881 and 0.714                                                                                                                                          |                        |
| Theta range for data collection                                                  | 1.570 to 27.753°                                                                                                                                         |                        |
| Reflections collected                                                            | 9460                                                                                                                                                     |                        |
| Independent reflections                                                          | 9460 [R(int) = ?]                                                                                                                                        |                        |
| Data / restraints / parameters                                                   | 9460 / 0 / 514                                                                                                                                           |                        |
| <i>wR</i> ( <i>F</i> <sup>2</sup> all data)                                      | <i>wR</i> 2 = 0.0902                                                                                                                                     |                        |
| <i>R</i> ( <i>F</i> obsd data)                                                   | <i>R</i> 1 = 0.0358                                                                                                                                      |                        |
| Goodness-of-fit on <i>F</i> <sup>2</sup>                                         | 1.000                                                                                                                                                    |                        |
| Observed data [I > 2s(I)]                                                        | 7049                                                                                                                                                     |                        |
| Largest and mean shift / s.u.                                                    | 0.001 and 0.000                                                                                                                                          |                        |
| Largest diff. peak and hole                                                      | 0.587 and -0.425 e/Å <sup>3</sup>                                                                                                                        |                        |
| -----                                                                            |                                                                                                                                                          |                        |
| <i>wR</i> 2 = { $\sum [w(F_o^2 - F_c^2)^2] / \sum [w(F_o^2)^2]$ } <sup>1/2</sup> |                                                                                                                                                          |                        |
| <i>R</i> 1 = $\sum   F_o  -  F_c   / \sum  F_o $                                 |                                                                                                                                                          |                        |

Table S9. Bond lengths [ $\text{\AA}$ ] and angles [ $^\circ$ ] for  $[(\text{OEP})\text{Fe}(\text{NO})]\text{OTf}\cdot 2(\text{CH}_2\text{Cl}_2)$ .

---

|             |            |              |          |
|-------------|------------|--------------|----------|
| Fe(1)-N(5)  | 1.6371(15) | C(18)-C(19)  | 1.446(2) |
| Fe(1)-N(2)  | 1.9864(15) | C(18)-C(35)  | 1.496(3) |
| Fe(1)-N(4)  | 1.9899(15) | C(19)-C(20)  | 1.376(2) |
| Fe(1)-N(1)  | 1.9910(15) | C(20)-H(20)  | 0.9500   |
| Fe(1)-N(3)  | 1.9998(15) | C(21)-C(22)  | 1.527(3) |
| O(1)-N(5)   | 1.1473(19) | C(21)-H(21A) | 0.9900   |
| N(1)-C(1)   | 1.387(2)   | C(21)-H(21B) | 0.9900   |
| N(1)-C(4)   | 1.387(2)   | C(22)-H(22A) | 0.9800   |
| N(2)-C(6)   | 1.384(2)   | C(22)-H(22B) | 0.9800   |
| N(2)-C(9)   | 1.386(2)   | C(22)-H(22C) | 0.9800   |
| N(3)-C(14)  | 1.385(2)   | C(23)-C(24)  | 1.531(3) |
| N(3)-C(11)  | 1.390(2)   | C(23)-H(23A) | 0.9900   |
| N(4)-C(16)  | 1.382(2)   | C(23)-H(23B) | 0.9900   |
| N(4)-C(19)  | 1.383(2)   | C(24)-H(24A) | 0.9800   |
| C(1)-C(20)  | 1.377(3)   | C(24)-H(24B) | 0.9800   |
| C(1)-C(2)   | 1.442(3)   | C(24)-H(24C) | 0.9800   |
| C(2)-C(3)   | 1.357(3)   | C(25)-C(26)  | 1.525(3) |
| C(2)-C(21)  | 1.501(3)   | C(25)-H(25A) | 0.9900   |
| C(3)-C(4)   | 1.439(3)   | C(25)-H(25B) | 0.9900   |
| C(3)-C(23)  | 1.505(2)   | C(26)-H(26A) | 0.9800   |
| C(4)-C(5)   | 1.375(3)   | C(26)-H(26B) | 0.9800   |
| C(5)-C(6)   | 1.379(3)   | C(26)-H(26C) | 0.9800   |
| C(5)-H(5)   | 0.9500     | C(27)-C(28)  | 1.526(3) |
| C(6)-C(7)   | 1.437(3)   | C(27)-H(27A) | 0.9900   |
| C(7)-C(8)   | 1.364(3)   | C(27)-H(27B) | 0.9900   |
| C(7)-C(25)  | 1.493(3)   | C(28)-H(28A) | 0.9800   |
| C(8)-C(9)   | 1.440(2)   | C(28)-H(28B) | 0.9800   |
| C(8)-C(27)  | 1.494(2)   | C(28)-H(28C) | 0.9800   |
| C(9)-C(10)  | 1.373(2)   | C(29)-C(30)  | 1.532(3) |
| C(10)-C(11) | 1.376(2)   | C(29)-H(29A) | 0.9900   |
| C(10)-H(10) | 0.9500     | C(29)-H(29B) | 0.9900   |
| C(11)-C(12) | 1.437(2)   | C(30)-H(30A) | 0.9800   |
| C(12)-C(13) | 1.352(3)   | C(30)-H(30B) | 0.9800   |
| C(12)-C(29) | 1.500(2)   | C(30)-H(30C) | 0.9800   |
| C(13)-C(14) | 1.439(2)   | C(31)-C(32)  | 1.526(2) |
| C(13)-C(31) | 1.501(2)   | C(31)-H(31A) | 0.9900   |
| C(14)-C(15) | 1.365(3)   | C(31)-H(31B) | 0.9900   |
| C(15)-C(16) | 1.377(2)   | C(32)-H(32A) | 0.9800   |
| C(15)-H(15) | 0.9500     | C(32)-H(32B) | 0.9800   |
| C(16)-C(17) | 1.435(3)   | C(32)-H(32C) | 0.9800   |
| C(17)-C(18) | 1.358(3)   | C(33)-C(34)  | 1.520(3) |
| C(17)-C(33) | 1.500(2)   | C(33)-H(33A) | 0.9900   |



|              |            |              |          |
|--------------|------------|--------------|----------|
| C(33)-H(33B) | 0.9900     | S(1A)-C(1A)  | 1.816(2) |
| C(34)-H(34A) | 0.9800     | F(1A)-C(1A)  | 1.326(2) |
| C(34)-H(34B) | 0.9800     | F(2A)-C(1A)  | 1.330(2) |
| C(34)-H(34C) | 0.9800     | F(3A)-C(1A)  | 1.325(2) |
| C(35)-C(36)  | 1.526(3)   | Cl(1B)-C(2B) | 1.765(2) |
| C(35)-H(35A) | 0.9900     | C(2B)-Cl(3B) | 1.756(2) |
| C(35)-H(35B) | 0.9900     | C(2B)-H(2B1) | 0.9900   |
| C(36)-H(36A) | 0.9800     | C(2B)-H(2B2) | 0.9900   |
| C(36)-H(36B) | 0.9800     | Cl(4B)-C(5B) | 1.768(2) |
| C(36)-H(36C) | 0.9800     | C(5B)-Cl(6B) | 1.765(2) |
| S(1A)-O(2A)  | 1.4206(15) | C(5B)-H(5B1) | 0.9900   |
| S(1A)-O(1A)  | 1.4223(15) | C(5B)-H(5B2) | 0.9900   |
| S(1A)-O(3A)  | 1.4229(15) |              |          |

|                  |            |                   |            |
|------------------|------------|-------------------|------------|
| N(5)-Fe(1)-N(2)  | 98.61(7)   | C(4)-C(3)-C(23)   | 124.27(16) |
| N(5)-Fe(1)-N(4)  | 99.50(7)   | C(5)-C(4)-N(1)    | 123.96(17) |
| N(2)-Fe(1)-N(4)  | 161.89(6)  | C(5)-C(4)-C(3)    | 124.59(17) |
| N(5)-Fe(1)-N(1)  | 97.91(7)   | N(1)-C(4)-C(3)    | 111.45(15) |
| N(2)-Fe(1)-N(1)  | 88.92(6)   | C(4)-C(5)-C(6)    | 125.61(17) |
| N(4)-Fe(1)-N(1)  | 88.25(6)   | C(4)-C(5)-H(5)    | 117.2      |
| N(5)-Fe(1)-N(3)  | 101.14(7)  | C(6)-C(5)-H(5)    | 117.2      |
| N(2)-Fe(1)-N(3)  | 88.14(6)   | C(5)-C(6)-N(2)    | 124.33(16) |
| N(4)-Fe(1)-N(3)  | 88.72(6)   | C(5)-C(6)-C(7)    | 124.08(17) |
| N(1)-Fe(1)-N(3)  | 160.95(6)  | N(2)-C(6)-C(7)    | 111.55(16) |
| C(1)-N(1)-C(4)   | 103.69(14) | C(8)-C(7)-C(6)    | 106.44(16) |
| C(1)-N(1)-Fe(1)  | 127.77(12) | C(8)-C(7)-C(25)   | 128.13(17) |
| C(4)-N(1)-Fe(1)  | 127.44(12) | C(6)-C(7)-C(25)   | 125.39(17) |
| C(6)-N(2)-C(9)   | 104.15(14) | C(7)-C(8)-C(9)    | 106.69(16) |
| C(6)-N(2)-Fe(1)  | 126.81(12) | C(7)-C(8)-C(27)   | 128.44(17) |
| C(9)-N(2)-Fe(1)  | 127.36(12) | C(9)-C(8)-C(27)   | 124.84(16) |
| C(14)-N(3)-C(11) | 103.72(14) | C(10)-C(9)-N(2)   | 124.57(16) |
| C(14)-N(3)-Fe(1) | 126.57(12) | C(10)-C(9)-C(8)   | 124.26(17) |
| C(11)-N(3)-Fe(1) | 127.75(12) | N(2)-C(9)-C(8)    | 111.17(16) |
| C(16)-N(4)-C(19) | 104.13(14) | C(9)-C(10)-C(11)  | 125.57(17) |
| C(16)-N(4)-Fe(1) | 126.99(12) | C(9)-C(10)-H(10)  | 117.2      |
| C(19)-N(4)-Fe(1) | 127.68(12) | C(11)-C(10)-H(10) | 117.2      |
| O(1)-N(5)-Fe(1)  | 176.15(15) | C(10)-C(11)-N(3)  | 123.41(16) |
| C(20)-C(1)-N(1)  | 124.08(17) | C(10)-C(11)-C(12) | 125.17(17) |
| C(20)-C(1)-C(2)  | 124.33(17) | N(3)-C(11)-C(12)  | 111.42(15) |
| N(1)-C(1)-C(2)   | 111.56(15) | C(13)-C(12)-C(11) | 106.64(16) |
| C(3)-C(2)-C(1)   | 106.43(16) | C(13)-C(12)-C(29) | 127.43(17) |
| C(3)-C(2)-C(21)  | 129.16(17) | C(11)-C(12)-C(29) | 125.91(16) |
| C(1)-C(2)-C(21)  | 124.41(17) | C(12)-C(13)-C(14) | 106.93(16) |
| C(2)-C(3)-C(4)   | 106.83(16) | C(12)-C(13)-C(31) | 128.68(17) |
| C(2)-C(3)-C(23)  | 128.89(17) | C(14)-C(13)-C(31) | 124.34(16) |

|                     |            |                     |            |
|---------------------|------------|---------------------|------------|
| C(15)-C(14)-N(3)    | 124.45(17) | C(7)-C(25)-C(26)    | 113.35(16) |
| C(15)-C(14)-C(13)   | 124.26(17) | C(7)-C(25)-H(25A)   | 108.9      |
| N(3)-C(14)-C(13)    | 111.28(15) | C(26)-C(25)-H(25A)  | 108.9      |
| C(14)-C(15)-C(16)   | 125.54(17) | C(7)-C(25)-H(25B)   | 108.9      |
| C(14)-C(15)-H(15)   | 117.2      | C(26)-C(25)-H(25B)  | 108.9      |
| C(16)-C(15)-H(15)   | 117.2      | H(25A)-C(25)-H(25B) | 107.7      |
| C(15)-C(16)-N(4)    | 124.56(16) | C(25)-C(26)-H(26A)  | 109.5      |
| C(15)-C(16)-C(17)   | 123.99(17) | C(25)-C(26)-H(26B)  | 109.5      |
| N(4)-C(16)-C(17)    | 111.45(16) | H(26A)-C(26)-H(26B) | 109.5      |
| C(18)-C(17)-C(16)   | 106.88(16) | C(25)-C(26)-H(26C)  | 109.5      |
| C(18)-C(17)-C(33)   | 129.06(17) | H(26A)-C(26)-H(26C) | 109.5      |
| C(16)-C(17)-C(33)   | 124.05(17) | H(26B)-C(26)-H(26C) | 109.5      |
| C(17)-C(18)-C(19)   | 106.32(16) | C(8)-C(27)-C(28)    | 112.44(16) |
| C(17)-C(18)-C(35)   | 128.56(17) | C(8)-C(27)-H(27A)   | 109.1      |
| C(19)-C(18)-C(35)   | 125.11(17) | C(28)-C(27)-H(27A)  | 109.1      |
| C(20)-C(19)-N(4)    | 124.36(16) | C(8)-C(27)-H(27B)   | 109.1      |
| C(20)-C(19)-C(18)   | 124.39(17) | C(28)-C(27)-H(27B)  | 109.1      |
| N(4)-C(19)-C(18)    | 111.21(16) | H(27A)-C(27)-H(27B) | 107.8      |
| C(19)-C(20)-C(1)    | 125.15(17) | C(27)-C(28)-H(28A)  | 109.5      |
| C(19)-C(20)-H(20)   | 117.4      | C(27)-C(28)-H(28B)  | 109.5      |
| C(1)-C(20)-H(20)    | 117.4      | H(28A)-C(28)-H(28B) | 109.5      |
| C(2)-C(21)-C(22)    | 114.18(16) | C(27)-C(28)-H(28C)  | 109.5      |
| C(2)-C(21)-H(21A)   | 108.7      | H(28A)-C(28)-H(28C) | 109.5      |
| C(22)-C(21)-H(21A)  | 108.7      | H(28B)-C(28)-H(28C) | 109.5      |
| C(2)-C(21)-H(21B)   | 108.7      | C(12)-C(29)-C(30)   | 113.26(16) |
| C(22)-C(21)-H(21B)  | 108.7      | C(12)-C(29)-H(29A)  | 108.9      |
| H(21A)-C(21)-H(21B) | 107.6      | C(30)-C(29)-H(29A)  | 108.9      |
| C(21)-C(22)-H(22A)  | 109.5      | C(12)-C(29)-H(29B)  | 108.9      |
| C(21)-C(22)-H(22B)  | 109.5      | C(30)-C(29)-H(29B)  | 108.9      |
| H(22A)-C(22)-H(22B) | 109.5      | H(29A)-C(29)-H(29B) | 107.7      |
| C(21)-C(22)-H(22C)  | 109.5      | C(29)-C(30)-H(30A)  | 109.5      |
| H(22A)-C(22)-H(22C) | 109.5      | C(29)-C(30)-H(30B)  | 109.5      |
| H(22B)-C(22)-H(22C) | 109.5      | H(30A)-C(30)-H(30B) | 109.5      |
| C(3)-C(23)-C(24)    | 114.04(15) | C(29)-C(30)-H(30C)  | 109.5      |
| C(3)-C(23)-H(23A)   | 108.7      | H(30A)-C(30)-H(30C) | 109.5      |
| C(24)-C(23)-H(23A)  | 108.7      | H(30B)-C(30)-H(30C) | 109.5      |
| C(3)-C(23)-H(23B)   | 108.7      | C(13)-C(31)-C(32)   | 113.00(16) |
| C(24)-C(23)-H(23B)  | 108.7      | C(13)-C(31)-H(31A)  | 109.0      |
| H(23A)-C(23)-H(23B) | 107.6      | C(32)-C(31)-H(31A)  | 109.0      |
| C(23)-C(24)-H(24A)  | 109.5      | C(13)-C(31)-H(31B)  | 109.0      |
| C(23)-C(24)-H(24B)  | 109.5      | C(32)-C(31)-H(31B)  | 109.0      |
| H(24A)-C(24)-H(24B) | 109.5      | H(31A)-C(31)-H(31B) | 107.8      |
| C(23)-C(24)-H(24C)  | 109.5      | C(31)-C(32)-H(32A)  | 109.5      |
| H(24A)-C(24)-H(24C) | 109.5      | C(31)-C(32)-H(32B)  | 109.5      |
| H(24B)-C(24)-H(24C) | 109.5      | H(32A)-C(32)-H(32B) | 109.5      |

|                     |            |                     |            |
|---------------------|------------|---------------------|------------|
| C(31)-C(32)-H(32C)  | 109.5      | Cl(6B)-C(5B)-Cl(4B) | 110.83(11) |
| H(32A)-C(32)-H(32C) | 109.5      | Cl(6B)-C(5B)-H(5B1) | 109.5      |
| H(32B)-C(32)-H(32C) | 109.5      | Cl(4B)-C(5B)-H(5B1) | 109.5      |
| C(17)-C(33)-C(34)   | 112.62(16) | Cl(6B)-C(5B)-H(5B2) | 109.5      |
| C(17)-C(33)-H(33A)  | 109.1      | Cl(4B)-C(5B)-H(5B2) | 109.5      |
| C(34)-C(33)-H(33A)  | 109.1      | H(5B1)-C(5B)-H(5B2) | 108.1      |
| C(17)-C(33)-H(33B)  | 109.1      |                     |            |
| C(34)-C(33)-H(33B)  | 109.1      |                     |            |
| H(33A)-C(33)-H(33B) | 107.8      |                     |            |
| C(33)-C(34)-H(34A)  | 109.5      |                     |            |
| C(33)-C(34)-H(34B)  | 109.5      |                     |            |
| H(34A)-C(34)-H(34B) | 109.5      |                     |            |
| C(33)-C(34)-H(34C)  | 109.5      |                     |            |
| H(34A)-C(34)-H(34C) | 109.5      |                     |            |
| H(34B)-C(34)-H(34C) | 109.5      |                     |            |
| C(18)-C(35)-C(36)   | 114.11(15) |                     |            |
| C(18)-C(35)-H(35A)  | 108.7      |                     |            |
| C(36)-C(35)-H(35A)  | 108.7      |                     |            |
| C(18)-C(35)-H(35B)  | 108.7      |                     |            |
| C(36)-C(35)-H(35B)  | 108.7      |                     |            |
| H(35A)-C(35)-H(35B) | 107.6      |                     |            |
| C(35)-C(36)-H(36A)  | 109.5      |                     |            |
| C(35)-C(36)-H(36B)  | 109.5      |                     |            |
| H(36A)-C(36)-H(36B) | 109.5      |                     |            |
| C(35)-C(36)-H(36C)  | 109.5      |                     |            |
| H(36A)-C(36)-H(36C) | 109.5      |                     |            |
| H(36B)-C(36)-H(36C) | 109.5      |                     |            |
| O(2A)-S(1A)-O(1A)   | 115.57(11) |                     |            |
| O(2A)-S(1A)-O(3A)   | 114.69(11) |                     |            |
| O(1A)-S(1A)-O(3A)   | 114.94(11) |                     |            |
| O(2A)-S(1A)-C(1A)   | 103.60(10) |                     |            |
| O(1A)-S(1A)-C(1A)   | 102.19(9)  |                     |            |
| O(3A)-S(1A)-C(1A)   | 103.33(10) |                     |            |
| F(3A)-C(1A)-F(1A)   | 108.02(19) |                     |            |
| F(3A)-C(1A)-F(2A)   | 106.74(16) |                     |            |
| F(1A)-C(1A)-F(2A)   | 106.09(18) |                     |            |
| F(3A)-C(1A)-S(1A)   | 111.49(15) |                     |            |
| F(1A)-C(1A)-S(1A)   | 112.06(14) |                     |            |
| F(2A)-C(1A)-S(1A)   | 112.12(15) |                     |            |
| Cl(3B)-C(2B)-Cl(1B) | 111.51(12) |                     |            |
| Cl(3B)-C(2B)-H(2B1) | 109.3      |                     |            |
| Cl(1B)-C(2B)-H(2B1) | 109.3      |                     |            |
| Cl(3B)-C(2B)-H(2B2) | 109.3      |                     |            |
| Cl(1B)-C(2B)-H(2B2) | 109.3      |                     |            |
| H(2B1)-C(2B)-H(2B2) | 108.0      |                     |            |
